# Supplementary material
Source: Springer Nature journal article supplement (https://mijn.bsl.nl/resource/supplementary/13047_2012_492_MOESM3_ESM.pdf/7473936)

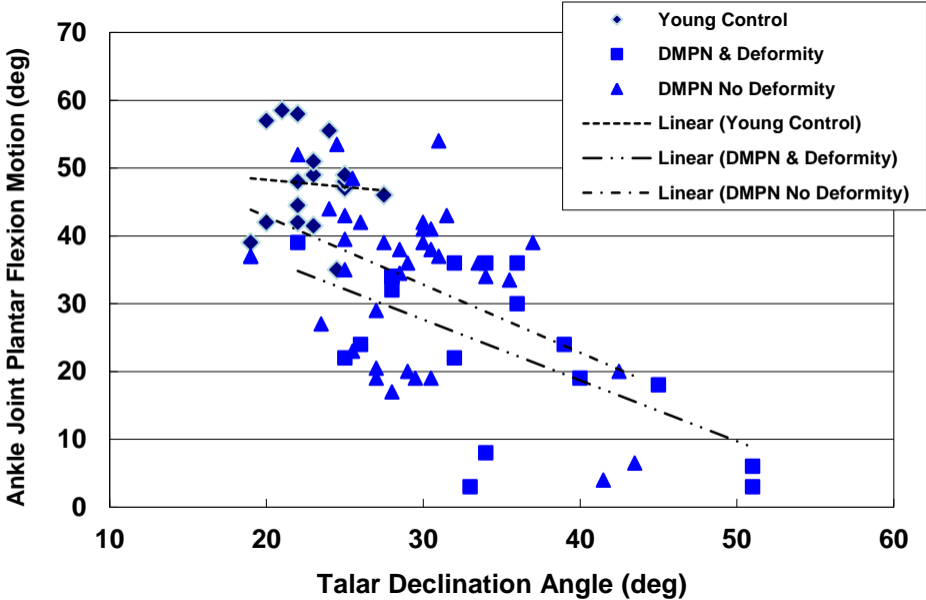

Supplement: MOESM3 [file 7473936]
